# Supplementary material for: Role of Actin Dependent Nuclear Deformation in Regulating Early Gene Expression
Source: PubMed Central journal article supplement (PMC3532443; doi:10.1371/journal.pone.0053031), 2012-12-28

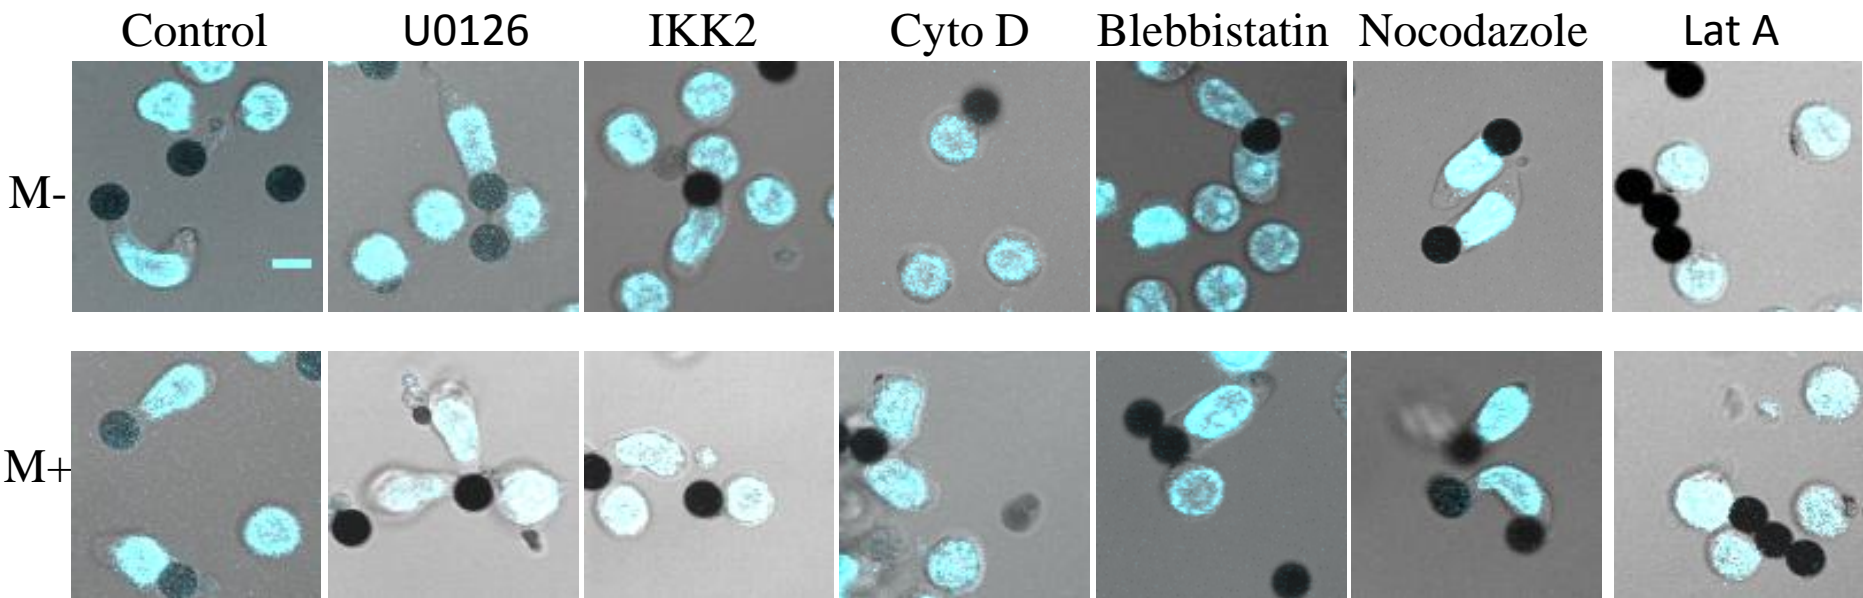

Supplement: pone.0053031.s003.pdf [file pone.0053031.s003.pdf]
